# Supplementary material
Source: PubMed Central journal article supplement (PMC6635453)
Supplement: supp_AC119.009475_153021_1_supp_343662_psnwgg.pdf [file supp_AC119.009475_153021_1_supp_343662_psnwgg.pdf]

## Supporting Information

The kynurenine pathway is essential for rhodoquinone biosynthesis  
in *Caenorhabditis elegans*

Paloma M. Roberts Buceta<sup>1</sup>, Laura Romanelli-Cedrez<sup>2</sup>, Shannon J. Babcock<sup>1#a</sup>, Helen Xun<sup>1#b</sup>, Miranda L. VonPaige<sup>1</sup>, Thomas W. Higley<sup>1</sup>, Tyler D. Schlatter<sup>1#c</sup>, Dakota C. Davis<sup>1</sup>, Julia A. Drexelius<sup>1</sup>, John C. Culver<sup>1</sup>, Inés Carrera<sup>2#d</sup>, Jennifer N. Shepherd<sup>1\*</sup>, Gustavo Salinas<sup>2\*</sup>

From the <sup>1</sup>Department of Chemistry and Biochemistry, Gonzaga University, Spokane, WA 99258;  
<sup>2</sup>Laboratorio de Biología de Gusano. Unidad Mixta, Departamento de Biociencias, Facultad de Química, Universidad de la República - Institut Pasteur de Montevideo, Montevideo, Uruguay.

### List of Materials

- p. S-2, TABLE S1. Statistical analysis of RQ<sub>9</sub> and Q<sub>9</sub> levels in mutant strains and RNAi knockdowns
- p. S-3, TABLE S2. *C. elegans* strains used in this study
- p. S-4, TABLE S3. Primers used for *kynu-1* reporter construction
- p. S-5, TABLE S4. RNAi clones and TaqMan assays for RT-PCR
- p. S-6, TABLE S5. LC-MS parameters for each quinone
- p. S-7, **Figure S1.** *kynu-1* is expressed during embryogenesis and the first larval stage in hypodermis and intestinal cells
- p. S-8, **Figure S2.** Quantitation of gene expression from *C. elegans* RNAi strains using RT-qPCR

TABLE S1. Statistical analysis of RQ<sub>9</sub> and Q<sub>9</sub> levels in mutant strains and RNAi knockdowns

| <b>Strain</b>        | <b>Avg pmol<br/>RQ<sub>9</sub>/mg pellet</b> | <b>p value<sup>a</sup><br/>(N = 3)</b> | <b>Avg pmol<br/>Q<sub>9</sub>/mg pellet</b> | <b>p value<br/>(N = 3)</b> |
|----------------------|----------------------------------------------|----------------------------------------|---------------------------------------------|----------------------------|
| N2                   | 3.27 ± 0.15                                  |                                        | 17.03 ± 0.71                                |                            |
| <i>afmd-1</i>        | 1.51 ± 0.09                                  | < 0.001                                | 13.24 ± 1.80                                | 0.0138                     |
| <i>kynu-1</i>        | 0                                            | < 0.001                                | 19.27 ± 1.76                                | 0.0633                     |
| <i>kmo-1</i>         | 0.51 ± 0.07                                  | < 0.001                                | 13.49 ± 0.88                                | 0.0027                     |
| <i>haao-1</i>        | 3.41 ± 0.61                                  | 0.360                                  | 14.41 ± 0.80                                | 0.0065                     |
| EV                   | 2.36 ± 0.20                                  |                                        | 9.48 ± 1.43                                 |                            |
| <i>kynu-1</i> (RNAi) | 0.51 ± 0.05                                  | < 0.001                                | 9.95 ± 2.52                                 | 0.397                      |
| <i>coq-3</i> (RNAi)  | 1.67 ± 0.12                                  | 0.003                                  | 7.01 ± 0.58                                 | 0.025                      |
| <i>coq-5</i> (RNAi)  | 1.26 ± 0.17                                  | < 0.001                                | 5.21 ± 1.05                                 | 0.007                      |
| <i>coq-6</i> (RNAi)  | 1.02 ± 0.04                                  | < 0.001                                | 5.10 ± 0.22                                 | 0.003                      |
| <i>coq-7</i> (RNAi)  | 2.05 ± 0.20                                  | 0.068                                  | 6.29 ± 0.32                                 | 0.010                      |
| <i>unc-22</i> (RNAi) | 2.59 ± 0.60                                  | 0.283                                  | 9.48 ± 1.92                                 | 0.500                      |

<sup>a</sup>The Student's T-test was used to analyze triplicate samples with significance noted at the  $\alpha < 0.05$  level. The standard deviation in each data set is represented by  $\pm$  and shown as error bars in Figs. 2B, 2C and 4B.

TABLE S2. *C. elegans* strains used in this study.

| Strain | Gene                          | Allele | Variation type     | Nucleotide change                  | Genotype                 | Source                                                           |            |
|--------|-------------------------------|--------|--------------------|------------------------------------|--------------------------|------------------------------------------------------------------|------------|
| N2     | <i>Bristol wild isolation</i> |        |                    |                                    |                          | CGC                                                              |            |
| NL2099 | <i>rrf-3</i>                  | pk1426 | deletion           | 3055 bp deletion                   | <i>rrf-3(pk1426) II</i>  | CGC                                                              |            |
| Tm4924 | <i>kynu-1</i>                 | tm4924 | insertion/deletion | 19 bp insertion<br>521 bp deletion | <i>kynu-1(tm4924) X</i>  | NBPJ                                                             |            |
| Tm4529 | <i>kmo-1</i>                  | tm4529 | deletion           | 326 bp deletion                    | <i>kmo-1(tm4529) V</i>   | NBPJ                                                             |            |
| Tm4547 | <i>afmd-1</i>                 | tm4547 | deletion           | 425 bp deletion                    | <i>afmd-1(tm4547) IV</i> | NBPJ                                                             |            |
| Tm4627 | <i>haao-1</i>                 | tm4627 | insertion/deletion | 9 bp insertion<br>305 bp deletion  | <i>haao-1(tm4627) V</i>  | NBPJ                                                             |            |
| IH25   |                               |        |                    |                                    |                          | <i>kynu-1(tm4924)X;</i><br><i>Ex[Pkynu-1::kynu-1::gfp, pRF4]</i> | This study |

TABLE S3. Primers used for *kynu-1* reporter construction

| <b>Primer name</b>       | <b>Sequence</b>                             |
|--------------------------|---------------------------------------------|
| <i>kynu-1</i> FW pPD9577 | acgctaacaacttggaatgaaataccgaattagtttaatggac |
| <i>kynu-1</i> RE pPD9577 | cttggccaatcccgggaccttcgcttcgacaatatgagcaac  |
| pPD9577 RE               | attcattccaagttgttagcgtatccatcg              |

TABLE S4. RNAi clones and TaqMan assays for RT-PCR

| <b>Strain</b>                    | <b>Gene</b>       | <b><sup>a</sup>Clone Number</b> | <b>Insert</b>  | <b>Source</b>     | <b><sup>b</sup>TaqMan assay</b> |
|----------------------------------|-------------------|---------------------------------|----------------|-------------------|---------------------------------|
|                                  | <i>kynu-1</i>     | DFCIp3320G0510040D              | C15H9.7        | Source Bioscience | Ce02495988_g1                   |
|                                  | <i>coq3</i>       | CUUkp3303J037Q                  | sjj_Y57G11C.11 | Source Bioscience | Ce02467843_g1                   |
| <i>E. coli</i><br>HT115<br>(DE3) | <i>coq5</i>       | CUUkp3302K054Q                  | sjj_ZK652.9    | Source Bioscience | Ce02449325_g1                   |
|                                  | <i>coq6</i>       | CUUKp3315A0214Q                 | sjj2_K07B1.2   | Source Bioscience | Ce02479593_g1                   |
|                                  | <i>coq7/clk-1</i> | CUUkp3302B242Q                  | sjj_ZC395.2    | <sup>c</sup> gift | Ce02446729_g1                   |
|                                  | <i>unc-22</i>     | CUUkp3303K066Q                  | sjj_ZK617.1    | <sup>c</sup> gift | Ce02465425_g1                   |

<sup>a</sup>All clones were from Ahringer library, L4440 (pPD129.36) except for *kynu-1* was from Vidal library, pL4440\_DEST

<sup>b</sup>Purchased from ThermoFisher Scientific (Rockford, IL, USA) with FAM-MGB, 20X

<sup>c</sup>Gift from Dr. Jennifer Watts, School of Molecular Sciences, Washington State University, Pullman, WA

TABLE S5. LC-MS parameters for each quinone

| <b>MS parameter</b>                              | <b>Q<sub>3</sub></b> | <b>RQ<sub>9</sub></b> | <b>Q<sub>9</sub></b> |
|--------------------------------------------------|----------------------|-----------------------|----------------------|
| Dwell time (s)                                   | 0.1                  | 0.1                   | 0.1                  |
| Cone (V)                                         | 20                   | 39                    | 35                   |
| Collision (V)                                    | 20                   | 30                    | 30                   |
| Precursor mass [M+H] <sup>+</sup> ( <i>m/z</i> ) | 387.2                | 780.6                 | 795.6                |
| Ion product mass [M] <sup>+</sup> ( <i>m/z</i> ) | 197.2                | 182.2                 | 197.2                |

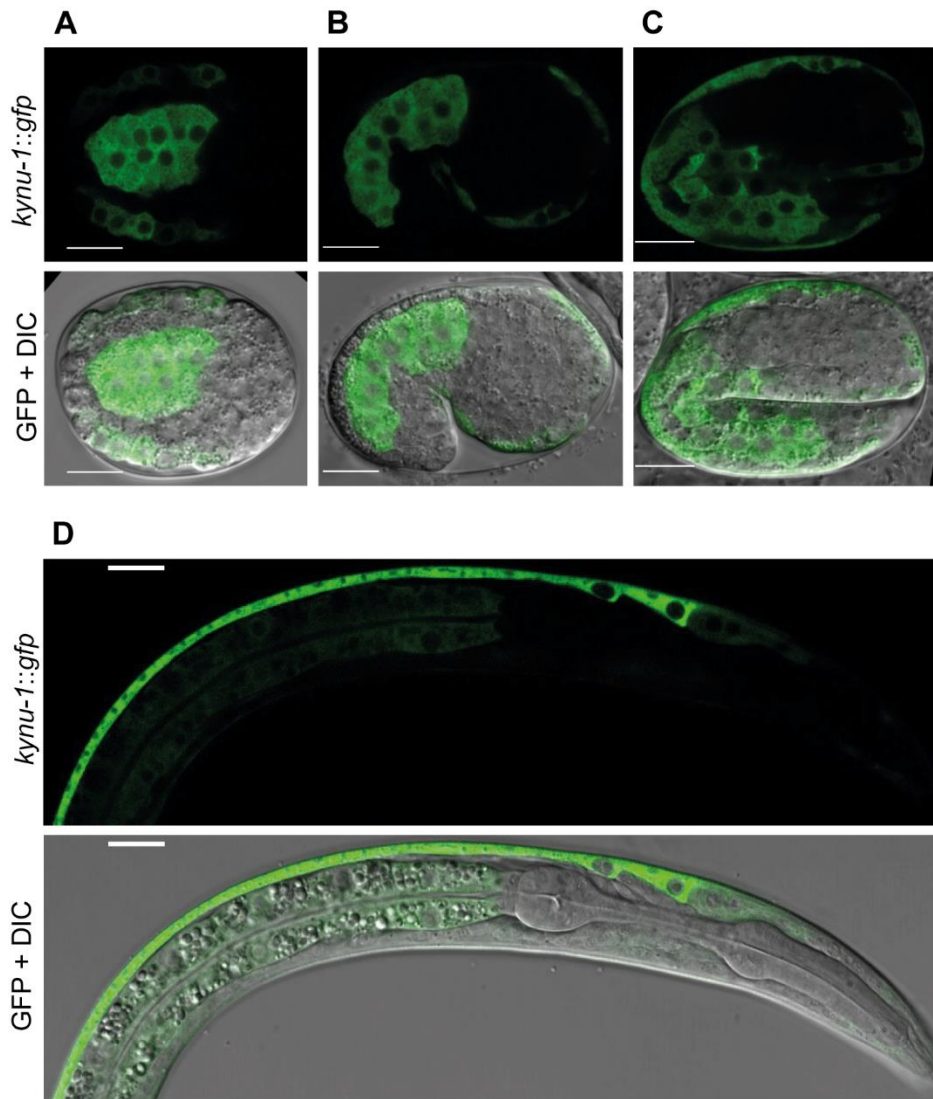

**Figure S1.** *kynu-1* is expressed during embryogenesis and the first larval stage in hypodermis and intestinal cells. Confocal images of selected planes show transgenic animals expressing the translational construct *Pkynu-1::kynu-1::gfp*. The stages shown are: (A) E16 dorsal view, (B) Comma lateral view, (C) 2-fold lateral view and (D) L1 lateral view. Scale bar 10  $\mu$ m.

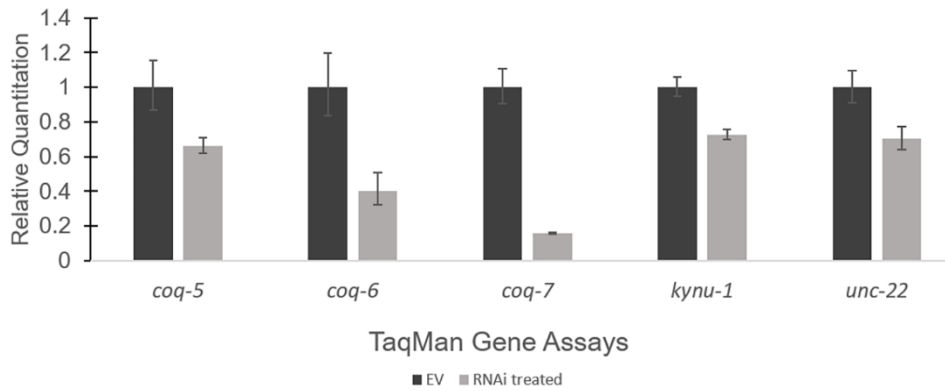

**Figure S2.** Quantitation of gene expression from *C. elegans* RNAi strains using RT-qPCR. A standard comparative  $C_T$  ( $\Delta\Delta C_T$ ) experiment was performed with the TaqMan gene expression assays (Table S4) on a StepOnePlus™ Real-Time PCR system (Life Technologies, Waltham, MA). ROX™ dye was used as a passive reference and EV cDNA was used as an active reference in each experiment. Each cDNA sample and no RT control was tested in triplicate with each assay, and the average  $C_T$  values were generated for each biological sample with each gene target.  $\Delta C_T$  and  $\Delta\Delta C_T$  values were obtained in order to determine the range of fold-change values, comparing RNAi knockdowns to EV control. Relative quantitation (RQ) ranges were determined through standard propagation of error. TaqMan gene assays for *coq-5*, *coq-6*, *coq-7*, *kynu-1* and *unc-22* showed reduction of expression compared to the EV reference, using the *cdc-42* endogenous control. The relative quantitation values were significant for *coq-6* and *coq-7* (more than 2-fold smaller), and weakly significant for *coq-5*, *kynu-1*, and *unc-22*. The *coq-3* TaqMan assay did not allow for quantitation due to inconsistent amplification of *cdc-42* in the sample and reference.
